# Supplementary material for: Acid Resistance of CAD/CAM Resin Composites
Source: MDPI journal article supplement (doi:10.3390/biomedicines10061383), 2022-06-11
Supplement: s1 [file s1]

## Supplementary Materials

**Table S1.** Media-specific surface roughness (Sa in  $\mu\text{m}$ ) of the different specimens: BRILLIANT Crios (BR), CERASMART (CE), Grandio blocs (GR), Lava Ultimate (LA), SHOFU Block HC (SH).

| Specimen | Media             | Sa (Mean $t_0$ ) | Sa (Mean $t_1$ ) | $\Delta t_1 - t_0$ | Standard deviation | <i>p</i> Value   |
|----------|-------------------|------------------|------------------|--------------------|--------------------|------------------|
| BR       | M <sub>H2O</sub>  | 0.012            | 0.014            | 0.002              | 0.001              | <b>&lt;0.001</b> |
|          | M <sub>TW</sub>   | 0.011            | 0.011            | −0.001             | 0.001              | 0.157            |
|          | M <sub>AcOH</sub> | 0.011            | 0.012            | 0.002              | 0.001              | <b>0.010</b>     |
|          | M <sub>HCl</sub>  | 0.010            | 0.011            | 0.001              | 0.001              | <b>0.023</b>     |
| CE       | M <sub>H2O</sub>  | 0.009            | 0.015            | 0.004              | 0.001              | <b>&lt;0.001</b> |
|          | M <sub>TW</sub>   | 0.008            | 0.014            | −0.001             | 0.001              | 0.180            |
|          | M <sub>AcOH</sub> | 0.010            | 0.009            | 0.006              | 0.002              | <b>0.012</b>     |
|          | M <sub>HCl</sub>  | 0.012            | 0.016            | 0.007              | 0.003              | <b>0.011</b>     |
| GR       | M <sub>H2O</sub>  | 0.014            | 0.016            | 0.002              | 0.001              | <b>0.004</b>     |
|          | M <sub>TW</sub>   | 0.014            | 0.014            | 0.000              | 0.000              | 0.351            |
|          | M <sub>AcOH</sub> | 0.014            | 0.016            | 0.003              | 0.001              | <b>0.010</b>     |
|          | M <sub>HCl</sub>  | 0.013            | 0.015            | 0.002              | 0.000              | <b>0.007</b>     |
| LA       | M <sub>H2O</sub>  | 0.017            | 0.014            | −0.003             | 0.004              | 0.088            |
|          | M <sub>TW</sub>   | 0.012            | 0.011            | −0.001             | 0.003              | 0.394            |
|          | M <sub>AcOH</sub> | 0.010            | 0.014            | 0.004              | 0.004              | 0.058            |
|          | M <sub>HCl</sub>  | 0.030            | 0.014            | −0.016             | 0.017              | <b>0.018</b>     |
| SH       | M <sub>H2O</sub>  | 0.036            | 0.011            | −0.025             | 0.009              | <b>0.012</b>     |
|          | M <sub>TW</sub>   | 0.023            | 0.018            | −0.005             | 0.005              | <b>0.020</b>     |
|          | M <sub>AcOH</sub> | 0.028            | 0.038            | 0.010              | 0.009              | <b>0.022</b>     |
|          | M <sub>HCl</sub>  | 0.030            | 0.026            | −0.004             | 0.004              | <b>0.025</b>     |

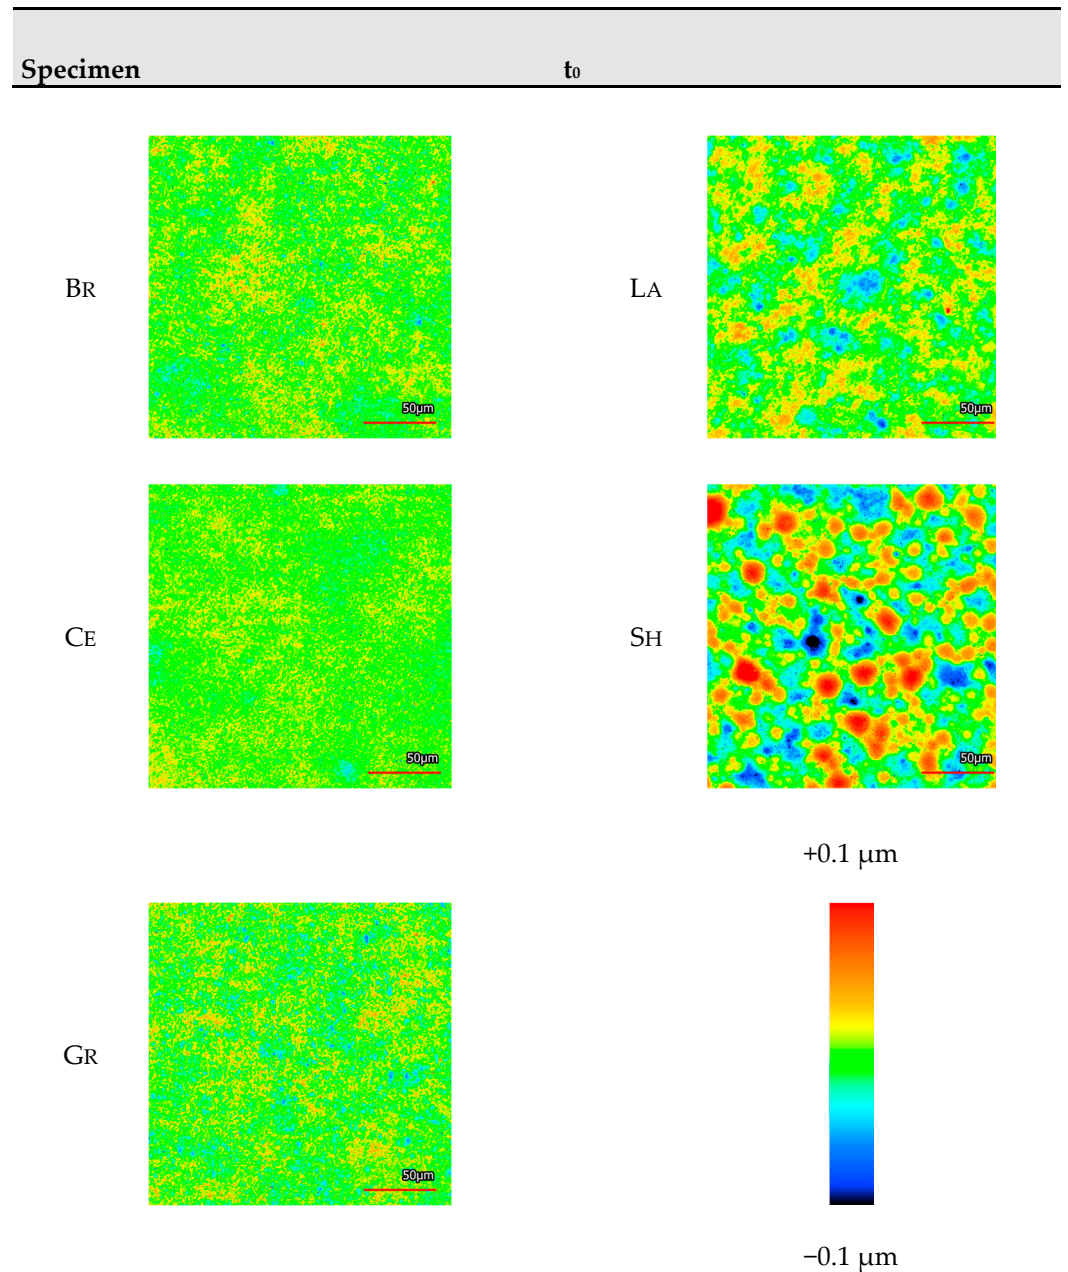

**Figure S1.** Surface of the CAD/CAM resin composite specimen before ( $t_0$ ) immersion in the different media. Representative surface renderings are shown in height-scaled false colours. A pronounced heterogeneity can be observed in the surfaces of SH compared to the other CAD/CAM resin composites: BRILLIANT Crios (BR), CERASMART (CE), Grandio blocs (GR), Lava Ultimate (LA), SHOFU Block HC (SH).

**Table S2.** Media-specific Vickers hardness (HV) of the different specimens.

| Specimen | Media             | HV (Mean<br>t <sub>0</sub> ) | HV (Mean<br>t <sub>1</sub> ) | $\Delta_{t1-t0}$ | Standard<br>deviation | <i>p</i> Value    |
|----------|-------------------|------------------------------|------------------------------|------------------|-----------------------|-------------------|
| BR       | M <sub>H2O</sub>  | 79.3                         | 77.1                         | -2.2             | 3.9                   | 0.434             |
|          | M <sub>TW</sub>   | 82.0                         | 77.3                         | -4.7             | 1.8                   | 0.109             |
|          | M <sub>AcOH</sub> | 84.6                         | 78.5                         | -6.1             | 6.0                   | 0.220             |
|          | M <sub>HCl</sub>  | 81.5                         | 79.1                         | -2.4             | 0.2                   | <b>0.003</b>      |
| CE       | M <sub>H2O</sub>  | 80.5                         | 79.0                         | -1.5             | 6.9                   | 0.750             |
|          | M <sub>TW</sub>   | 84.2                         | 91.9                         | 7.7              | 7.6                   | 0.219             |
|          | M <sub>AcOH</sub> | 69.7                         | 74.9                         | 5.3              | 3.1                   | 0.109             |
|          | M <sub>HCl</sub>  | 77.6                         | 72.4                         | -5.2             | 2.0                   | <b>0.044</b>      |
| GR       | M <sub>H2O</sub>  | 161.5                        | 145.4                        | -16.1            | 26.8                  | 0.408             |
|          | M <sub>TW</sub>   | 147.5                        | 152.5                        | 5.0              | 7.4                   | 0.362             |
|          | M <sub>AcOH</sub> | 148.7                        | 161.6                        | 12.9             | 5.1                   | <b>0.047</b>      |
|          | M <sub>HCl</sub>  | 157.6                        | 146.6                        | -11.0            | 5.6                   | 0.075             |
| LA       | M <sub>H2O</sub>  | 114.5                        | 116.4                        | 2.0              | 5.2                   | 0.582             |
|          | M <sub>TW</sub>   | 118.2                        | 106.5                        | -11.7            | 8.1                   | 0.109             |
|          | M <sub>AcOH</sub> | 113.3                        | 114.0                        | 0.7              | 3.5                   | 0.751             |
|          | M <sub>HCl</sub>  | 112.0                        | 111.9                        | -0.1             | 3.4                   | 0.958             |
| SH       | M <sub>H2O</sub>  | 78.9                         | 83.0                         | 4.1              | 6.9                   | 0.285             |
|          | M <sub>TW</sub>   | 66.8                         | 66.5                         | -0.4             | 1.6                   | 0.742             |
|          | M <sub>AcOH</sub> | 78.7                         | 75.9                         | -2.8             | 1.6                   | 0.095             |
|          | M <sub>HCl</sub>  | 70.5                         | 76.8                         | 6.3              | 0.2                   | <b>&lt; 0.001</b> |
